# Supplementary material for: NNetEn2D: Two-Dimensional Neural Network Entropy in Remote Sensing Imagery and Geophysical Mapping
Source: MDPI journal article supplement (doi:10.3390/rs14092166), 2022-04-30
Supplement: s1 [file s1]

## INSTRUCTIONS for working with the Launcher.exe program

The program interface for calculating NNetEn2D is shown in Figure 1.

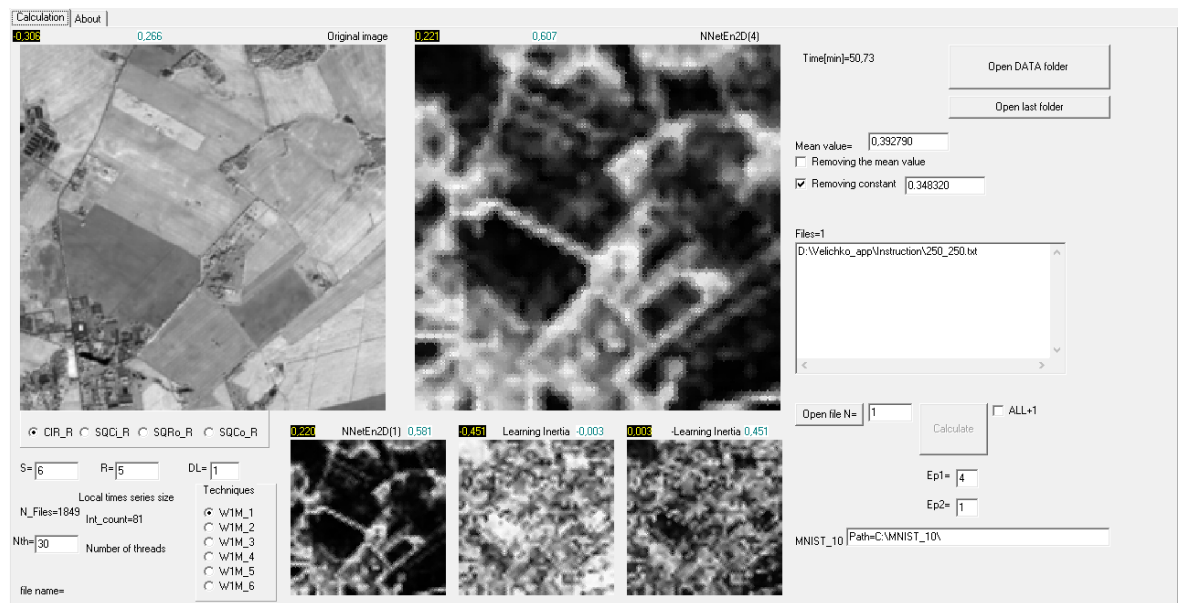

Figure 1. Launcher.exe interface.

Move the 'MNIST\_10' folder to the root directory, for example, to the C drive 'C:\MNIST\_10', the path to this folder can be written in the 'MNIST\_10' field using the pattern 'Path='. This operation is performed once before the first start of calculations.

1. Run the program NnetEn2D\_v1.0\Launcher.exe
2. Select the folder where the data files are located.  
The files must be text files ( .txt ) with an array of data where the number of rows is equal to the number of columns. The elements on each line are separated by spaces.
3. After selecting a folder, the image of the first file will automatically open in the 'Original window image '.
4. The button 'Open file N =' opens any other file with the serial number specified in the field next to it.
5. Optionally select the preprocessing method 'Removing the mean value' or 'Removing constant'.
6. Set the parameters of the method.  
Kernel type : CIR\_R, SQCi\_R , SQRo\_R or SQCo\_R  
Step: S  
Kernel radius: R  
Offset: DL  
Matrix filling method: W1M\_1- W1M\_6  
Number of Epochs: Ep1  
Auxiliary number of epochs for calculating learning inertia: Ep2
7. Set the number of processor threads 'Nth = '. The maximum value is 30. For optimal processor load, it is recommended to set Nth to the number of logical processors -1.
8. Calculations are started using the 'Calculate' button.
9. Auxiliary modules will be launched during the calculation.
10. After the calculation, files with the results will appear in the same folder as the initial data.
11. Option 'All+1' allows to calculate all files from the data folder.
